# Supplementary material
Source: PubMed Central journal article supplement (PMC9830489)

# Supplemental Material

## Supplemental Figures:

Figure S1:

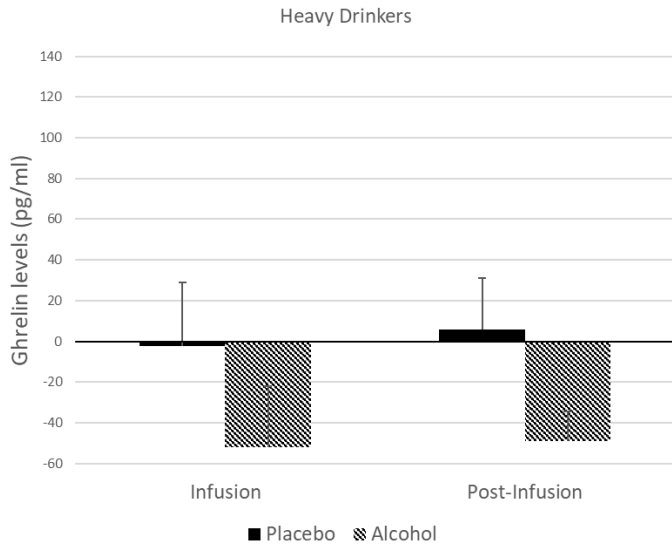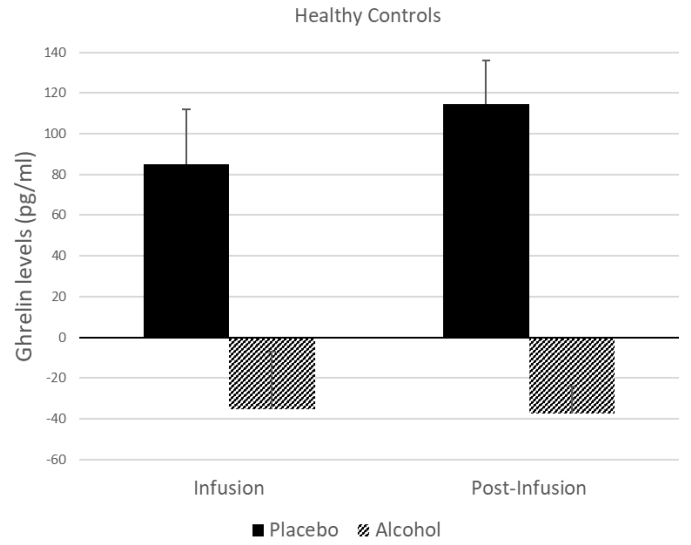

Figure S2:

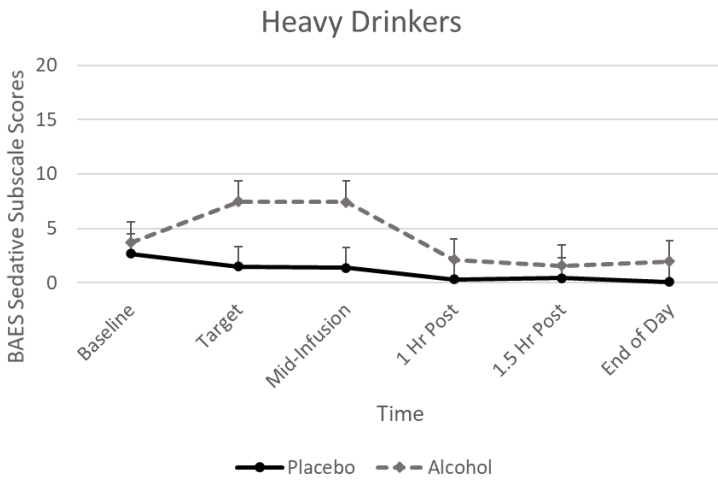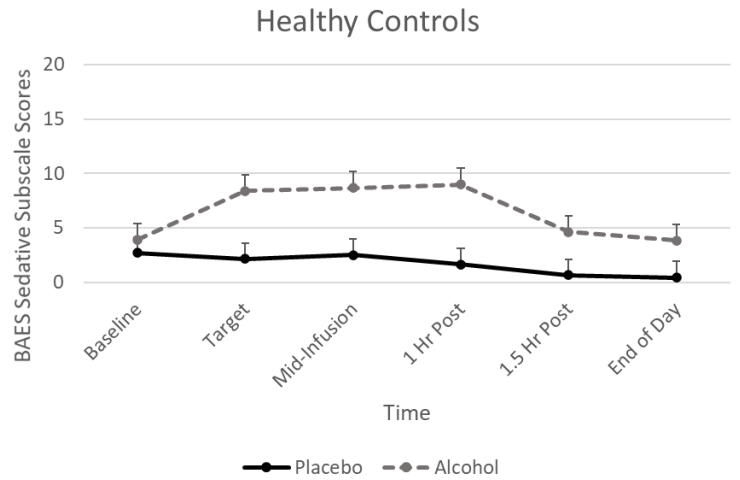

Supplement: supplemental_material_agac058.pdf [file supplemental_material_agac058.pdf]
